# Supplementary material
Source: publisher figshare collection journal article supplement (https://gsapubs.figshare.com/ndownloader/files/23299847)
Supplement: Supplementary file 1 [file 23299847]

## Sheet: Sheet1
		DR 2015324
Table DR1 Major element compositions of olivine, orthopyroxene and spinel from serpentinite in the W. Gangma Co ophiolitic melange, north-central Tibetan Plateau.
Samples		GMC1071														GMC1073
		Olivine						Orthopyroxene				Spinel				Olivine						Orthopyroxene				Spinel
SiO2		40.855	40.87	40.952	40.743	41.017		56.546	56.461	56.706		0.016	0.007	0.039		41.091	40.506	41.101	40.91	41.249		56.24	56.024	56.411		0.162	0.176	0.023	0.023	0.049
TiO2		0	0.004	0.066	0.033	0		0	0	0		0.032	0	0		0	0	0.008	0	0		0	0.008	0.002		0	0.022	0	0.024	0.032
Al2O3		0	0	0.009	0.021	0		2.457	2.513	2.171		61.053	60.41	61.925		0	0	0	0	0		2.437	2.47	2.268		61.61	60.819	59.945	60.413	62.697
Cr2O3		0.039	0.015	0	0	0.036		0.01	0.043	0		2.673	3.184	2.096		0.009	0.013	0.015	0.017	0.015		0.069	0.09	0.068		3.32	3.828	4.771	4.122	2.512
FeO		13.037	13.287	13.158	12.94	12.492		8.673	9.12	8.902		14.855	15.177	14.397		12.685	12.961	12.892	12.888	13.156		8.526	8.519	8.526		15.07	15.665	15.664	15.417	14.843
MnO		0.1	0.08	0.233	0.08	0.101		0.164	0.252	0.189		0.158	0	0.007		0	0.227	0.199	0.224	0.104		0.062	0.11	0.208		0.027	0.021	0.11	0.089	0
MgO		46.167	46.247	46.235	45.772	45.804		31.799	32.153	32.569		19.102	18.828	19.441		46.588	46.622	46.216	46.351	45.619		32.102	31.877	32.269		18.912	18.727	18.215	18.485	19.133
CaO		0.001	0.008	0	0.019	0		0.204	0.196	0.155		0.021	0	0.007		0	0	0.003	0.004	0		0.212	0.194	0.207		0	0.003	0	0	0
P2O5		0	0.009	0.006	0	0.003		0	0	0.016		0	0.003	0.012		0.009	0	0.016	0.028	0		0	0	0.003		0.006	0	0.022	0	0.006
Na2O		0	0	0	0.024	0.001		0	0	0.006		0.018	0.013	0		0	0	0.003	0.058	0		0	0	0.002		0	0.006	0	0.012	0
K2O		0.001	0	0.001	0.009	0.003		0	0	0.006		0	0	0		0.003	0	0	0	0.013		0.012	0	0		0	0.008	0	0.009	0
NiO		0.219	0.181	0.232	0.202	0.276		0	0.014	0		0.31	0.301	0.367		0.206	0.275	0.226	0.252	0.262		0.017	0.037	0		0.309	0.294	0.266	0.29	0.321
Total		100.419	100.701	100.892	99.843	99.733		99.853	100.752	100.72		98.238	97.923	98.291		100.591	100.604	100.679	100.732	100.418		99.677	99.329	99.964		99.416	99.569	99.016	98.884	99.593
Fo		86.23	86.05	86.02	86.24	86.64										86.75	86.3	86.29	86.3	85.98
Fa		13.66	13.87	13.73	13.68	13.26										13.25	13.46	13.5	13.46	13.91
Tp		0.11	0.08	0.25	0.09	0.11										0	0.24	0.21	0.24	0.11
Wo								0.4	0.38	0.29												0.41	0.38	0.4
En								86.12	85.6	86.17												86.56	86.45	86.44
Fs								13.49	14.02	13.51												13.03	13.17	13.16
Ac								0	0	0.02												0	0	0.01
Mg#		86.3239	86.1188	86.2319	86.3106	86.7297		86.7289	86.2714	86.7043		69.6236	68.8592	70.6479		86.7485	86.5076	86.4678	86.5055	86.0737		87.0319	86.9616	87.0903		69.1058	68.0597	67.4555	68.1239	69.675
Cr#												2.85322	3.41498	2.22019												3.48883	4.05123	5.06852	4.37679	2.61739
Analytical method
The mineral composition of in serpentinite from the ophiolitic mélange was determined by electron probe micro-analyzer (EPMA: JEOL JXA-8320) at the Institute of Mineral Resources, Chinese Academy of Geological Sciences (CAGS), Beijing. The operating conditions were 15 kV, 20nA beam current, and 5 μm probe diameter.
